# Supplementary material for: PRMT2 promotes RCC tumorigenesis and metastasis via enhancing WNT5A transcriptional expression
Source: PubMed Central journal article supplement (PMC10182089; doi:10.1038/s41419-023-05837-6), 2023-05-12

fig 1

F

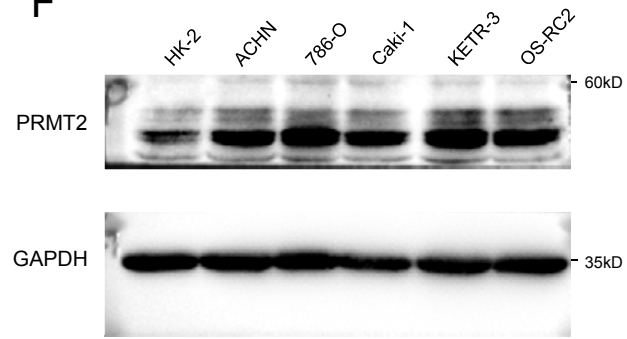

fig 2

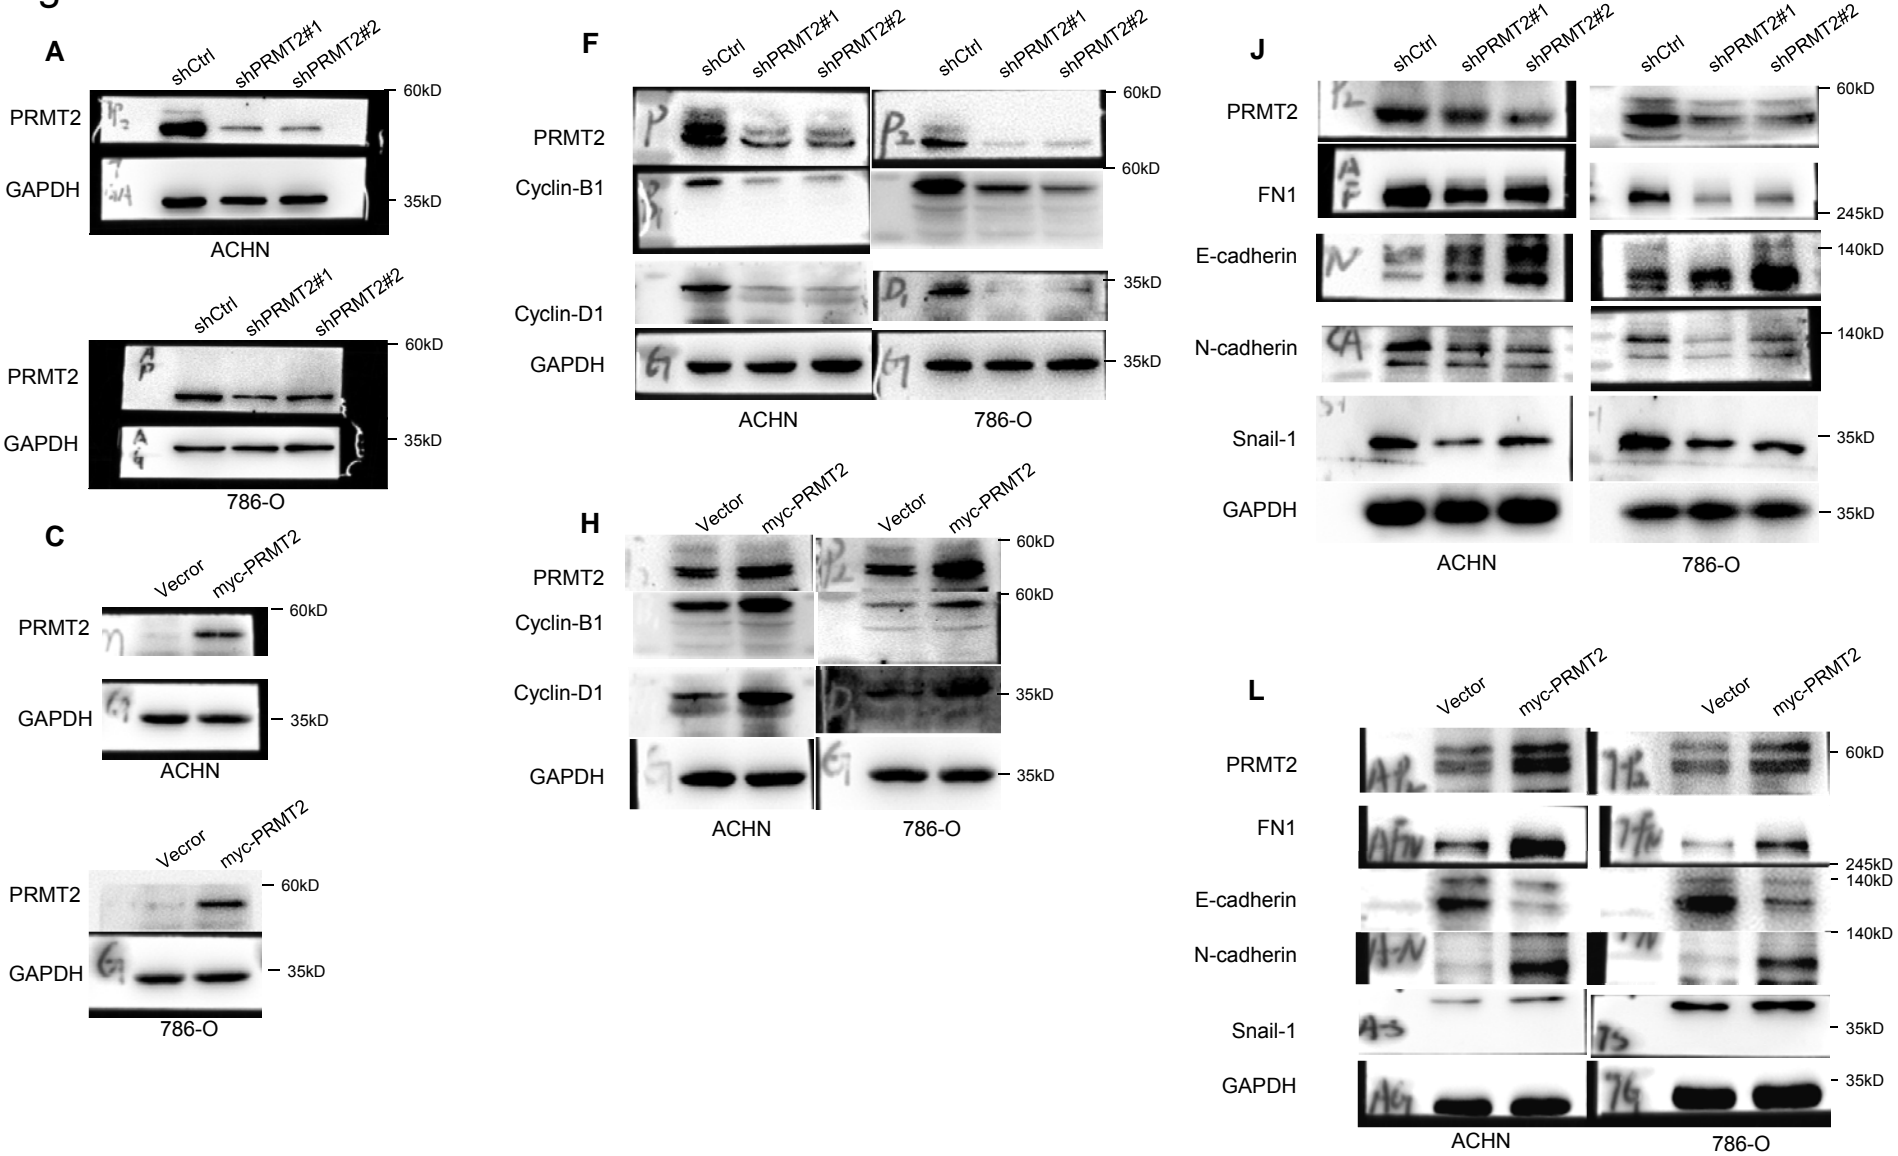

fig 3

H

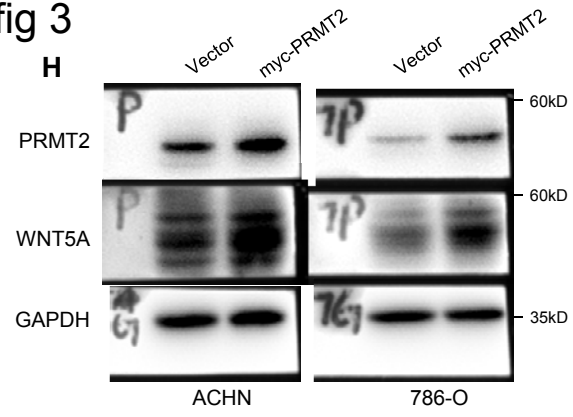

I

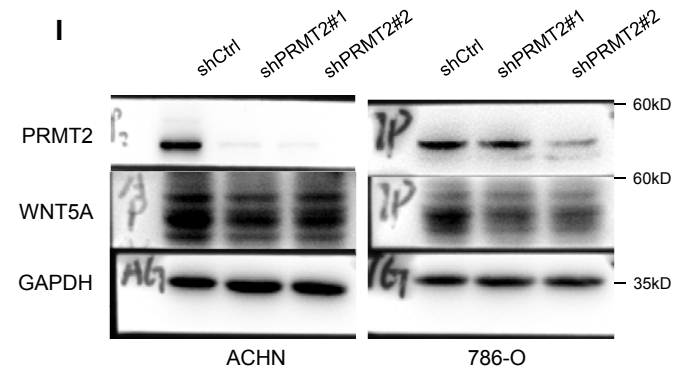

J

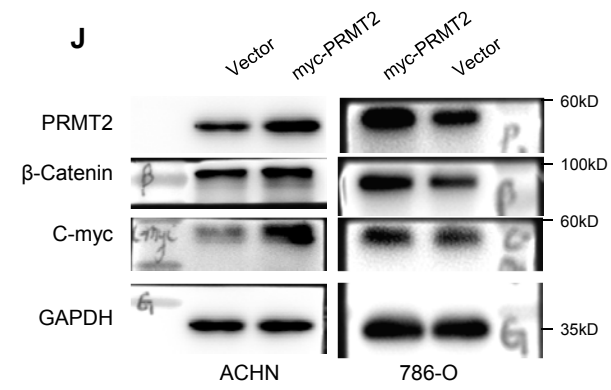

K

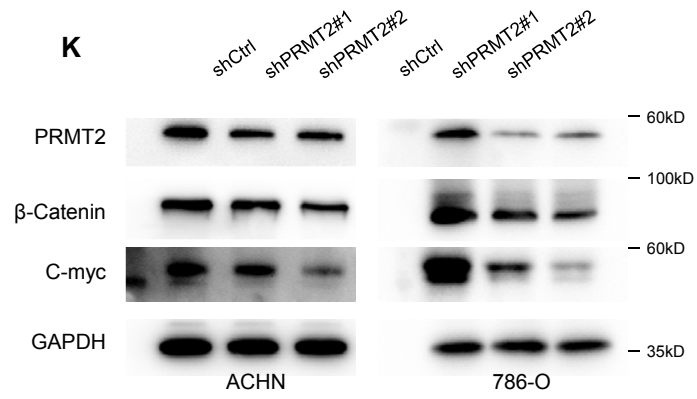

fig 4

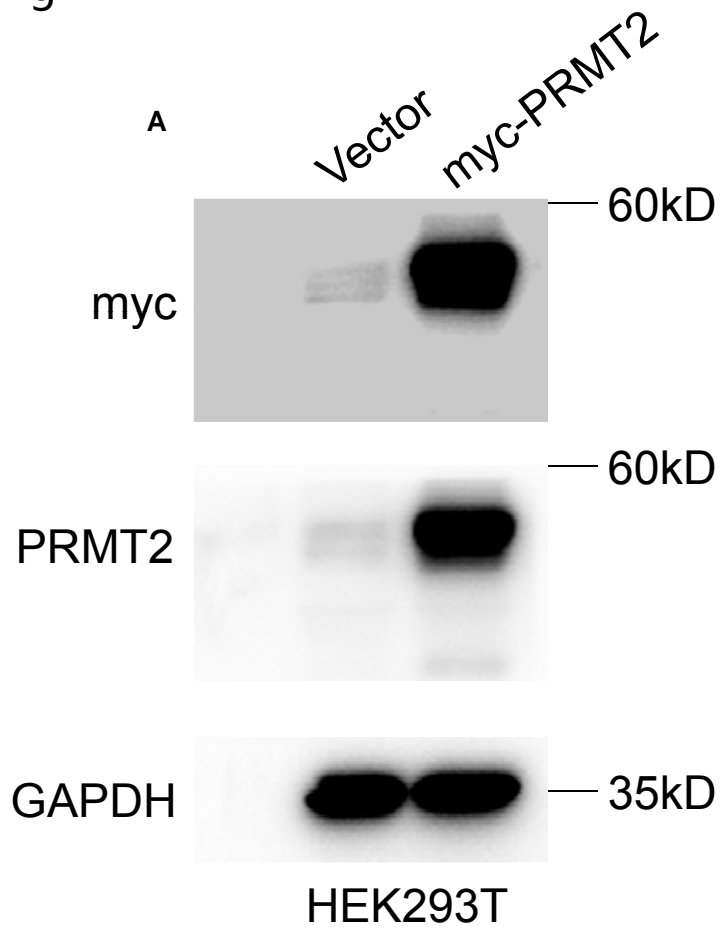

fig 5

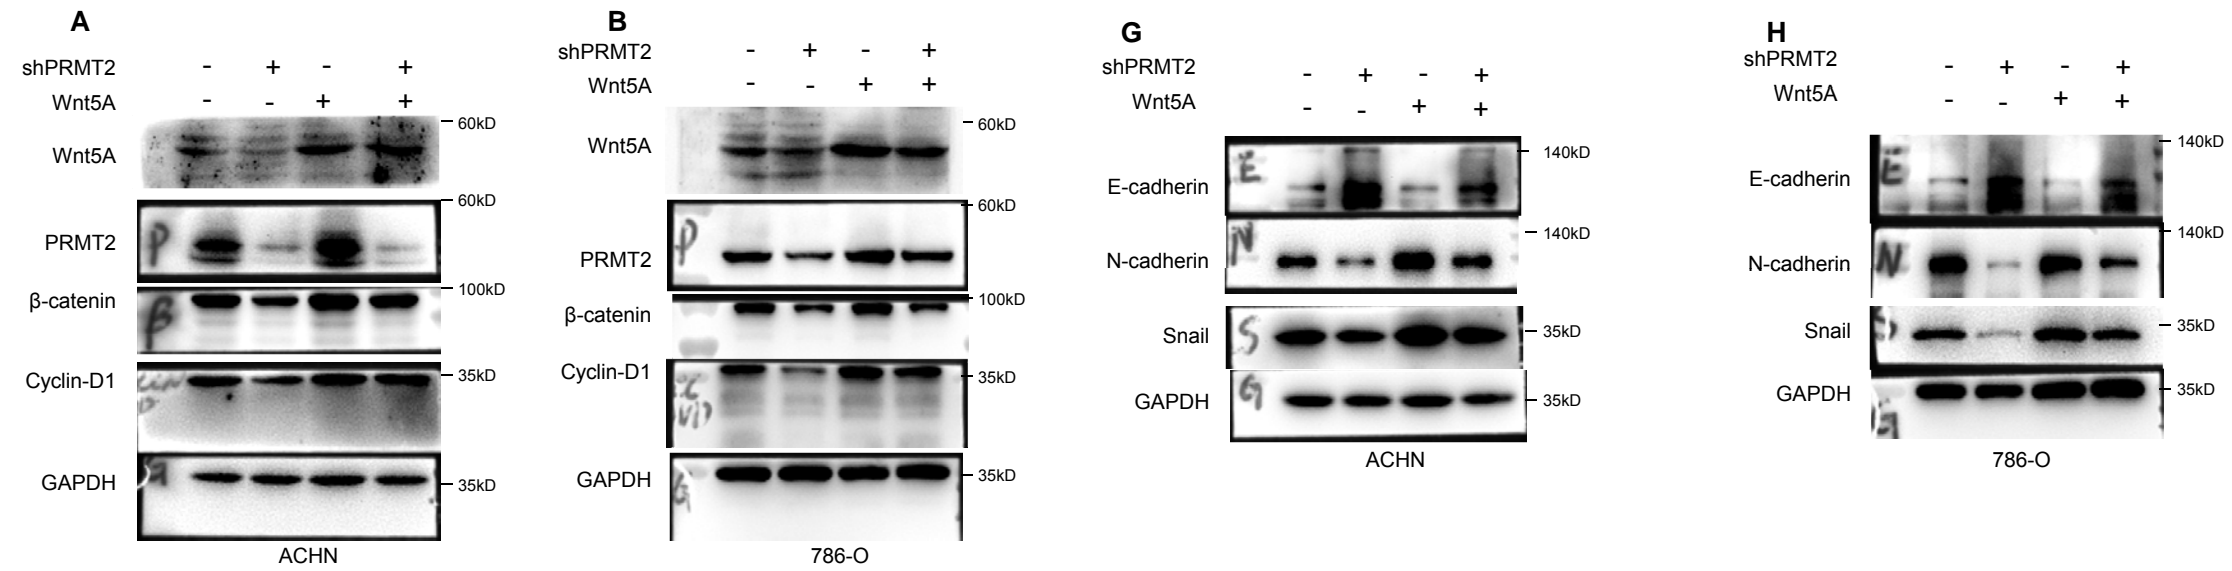

Supplementary Figure 1

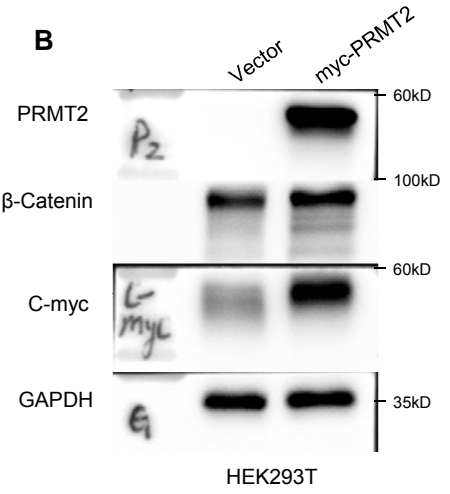

Supplementary Figure 2

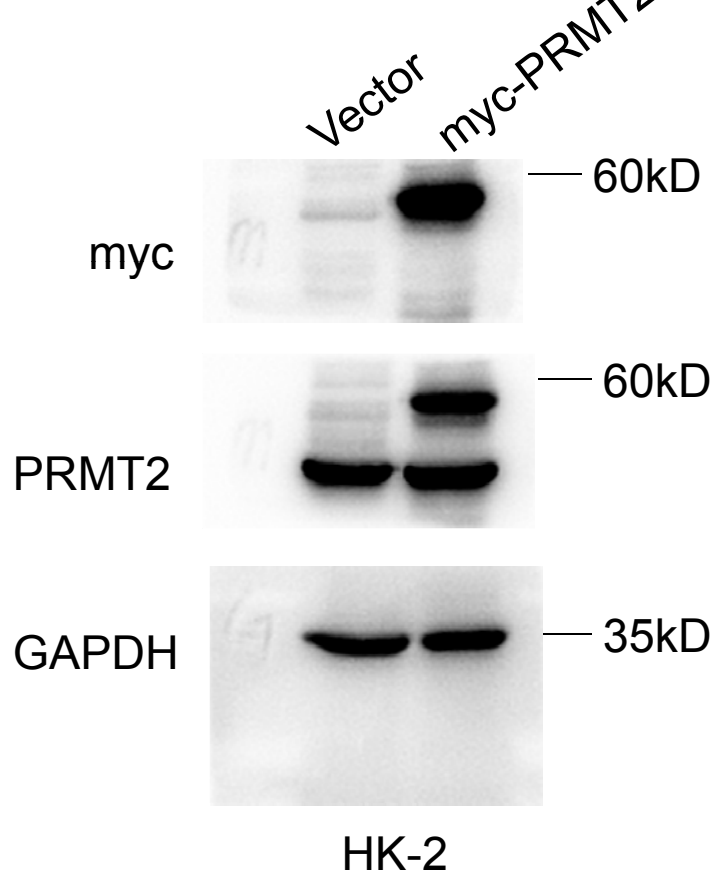

Supplementary Figure 3

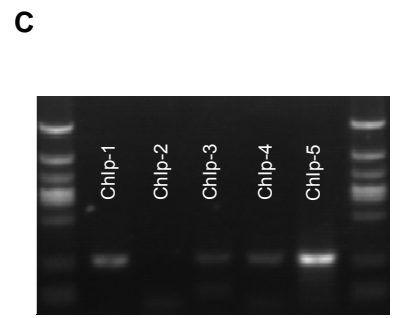

Supplement: 41419_2023_5837_MOESM14_ESM.pdf [file 41419_2023_5837_MOESM14_ESM.pdf]
